# Supplementary material
Source: Springer Nature journal article supplement (https://www.springermedizin.de/resource/supplementary/12877_2011_598_MOESM1_ESM.pdf/9439946)

Cluster

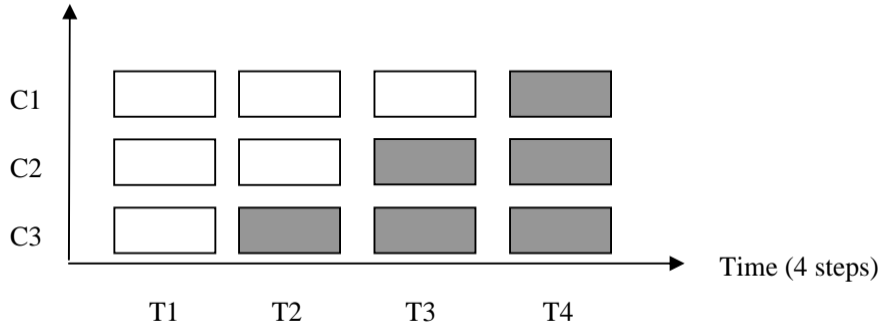

Supplement: MOESM1 [file 9439946]
